# Supplementary material for: Thiostrepton inhibits stable 70S ribosome binding and ribosome-dependent GTPase activation of elongation factor G and elongation factor 4
Source: PubMed Central journal article supplement — Nucleic Acids Res. 2011 Sep 9;40(1):360–70. doi: 10.1093/nar/gkr623 (PMC3245911; doi:10.1093/nar/gkr623), 2011-09-09
Supplement: supp_gkr623_walter_supplemental_material.pdf [file supp_gkr623_walter_supplemental_material.pdf]

Supplemental Figure 1 - Effect of thiostrepton on ribosome-dependent GTP hydrolysis activity of release factor 3 (RF3)

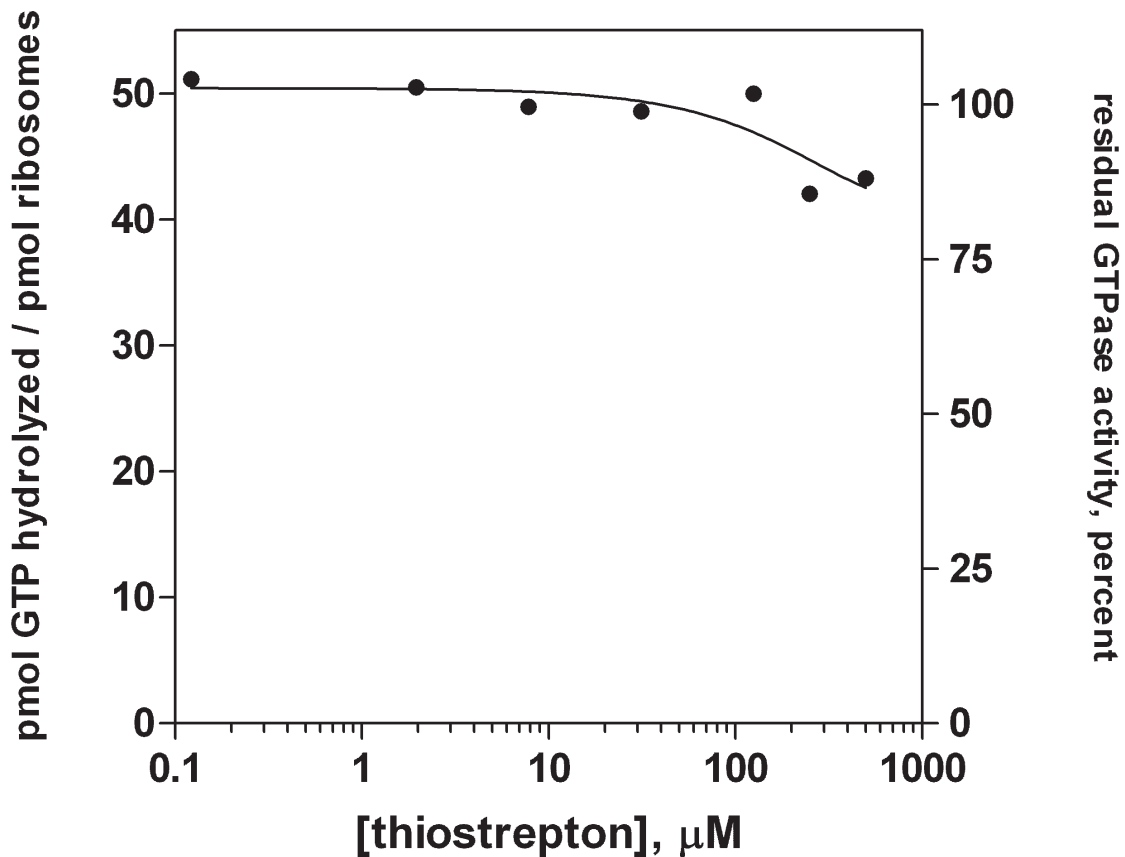

Plots indicate the amount of GTP hydrolyzed (left ordinate axis) as well as percent residual GTPase activity (right ordinate axis) after 10 minutes in the presence of ribosomes and thiostrepton. 100 percent activity corresponds to the amount of hydrolyzed GTP measured after 10 minutes in the absence of thiostrepton. Reactions contained 0.5  $\mu\text{M}$  RF3, 0.2  $\mu\text{M}$  ribosomes, 10  $\mu\text{M}$  [ $\gamma$ - $^{32}\text{P}$ ]GTP, 2% DMSO, and thiostrepton (at concentrations indicated on the abscissa).

## Supplemental Figure 2 - Quantification of primer extension modifications

Each Y-axis is pixel density in arbitrary units. Error bars are the standard deviation from triplicate measurements.

### A2660

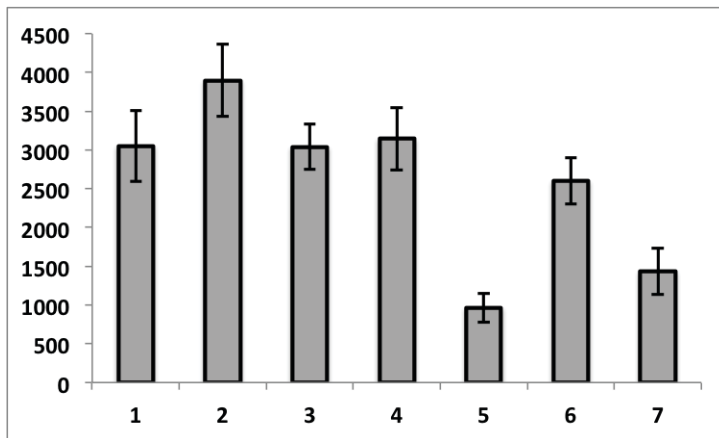

### A1067

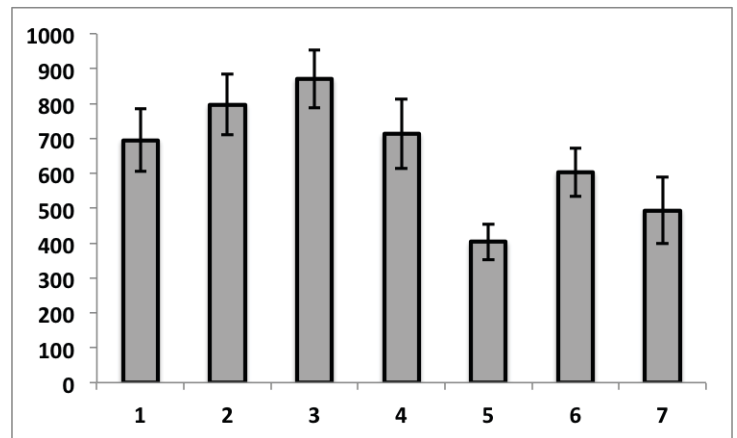

### A702

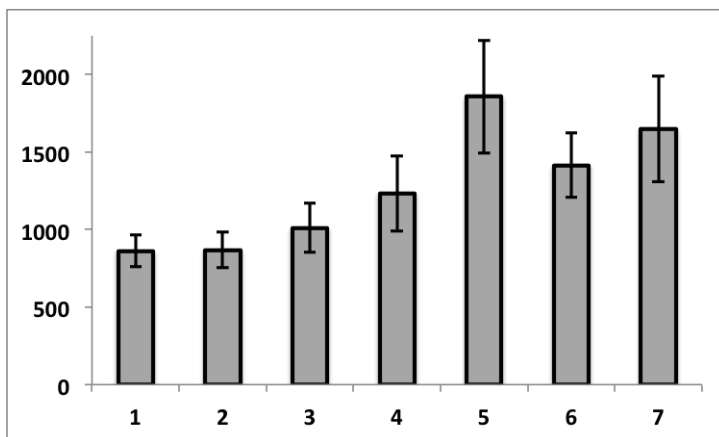

### C2394

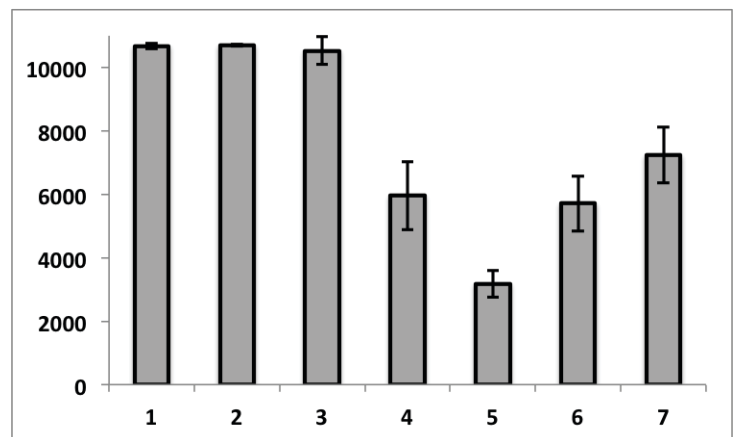

### C2556

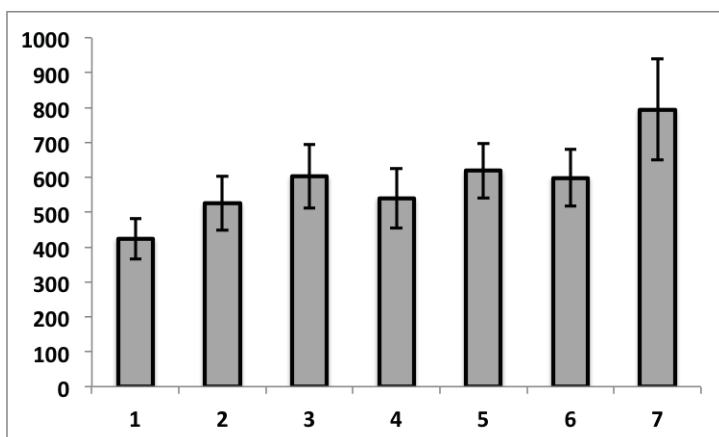

Lanes: (1) 70S ribosomes and mRNA; (2) 70S, mRNA, NAc-Phe-tRNA; (3) 70S, mRNA, NAc-Phe-tRNA, puromycin; (4) 70S, mRNA, NAc-Phe-tRNA, puromycin, EF-G•GTP; (5) 70S, mRNA, NAc-Phe-tRNA, puromycin, EF-G•GDPNP; (6) 70S, mRNA, NAc-Phe-tRNA, puromycin, EF4•GTP; (7) 70S, mRNA, NAc-Phe-tRNA, puromycin, EF4•GDPNP.
